1 **Title:** Evolution of spatial and temporal *cis*-regulatory divergence between marine and freshwater  
2 sticklebacks

3  
4 Katya L. Mack<sup>1</sup>, Tyler A. Square<sup>2</sup>, Bin Zhao<sup>1</sup>, Craig T. Miller<sup>2</sup>, Hunter B. Fraser<sup>1</sup>

5  
6 <sup>1</sup>Department of Biology, Stanford University, Stanford, CA, 94305

7 <sup>2</sup>Department of Molecular and Cell Biology, University of California, Berkeley, CA 94720

8 Correspondence to: hbfraser@stanford.edu

9  
10 **Abstract**

11 *Cis*-regulatory changes are thought to play a major role in adaptation. Threespine sticklebacks have  
12 repeatedly colonized freshwater habitats in the Northern Hemisphere, where they have evolved a suite of  
13 phenotypes that distinguish them from marine populations, including changes in physiology, behavior,  
14 and morphology. To understand the role of gene regulatory evolution in adaptive divergence, here we  
15 investigate *cis*-regulatory changes in gene expression between marine and freshwater ecotypes through  
16 allele-specific expression (ASE) in F1 hybrids. Surveying seven ecologically relevant tissues, including  
17 three sampled across two developmental stages, we identified *cis*-regulatory divergence affecting a third  
18 of genes, nearly half of which were tissue-specific. Next, we compared allele-specific expression in dental  
19 tissues at two timepoints to characterize *cis*-regulatory changes during development between marine and  
20 freshwater fish. Applying a genome-wide test for selection on *cis*-regulatory changes, we find evidence  
21 for lineage-specific selection on several processes, including the Wnt signaling pathway in dental tissues.  
22 Finally, we show that genes with ASE, particularly those that are tissue-specific, are enriched in genomic  
23 regions associated with marine-freshwater divergence, supporting an important role for *cis*-regulatory  
24 differences in adaptive evolution of sticklebacks. Altogether, our results provide insight into the *cis*-  
25 regulatory landscape of divergence between stickleback ecotypes and supports a fundamental role for *cis*-  
26 regulatory changes in rapid adaptation to new environments.

27

28

## 29 Introduction

30 Understanding how organisms adapt to new environments is a major goal in evolutionary biology. Central  
31 to this goal is understanding what genetic changes underlie adaptive traits. Threespine sticklebacks  
32 (*Gasterosteus aculeatus*) are a powerful model for studying the genetic basis of adaptation[1]. After the  
33 end of the last ice age, marine sticklebacks colonized thousands of freshwater habitats in the Northern  
34 Hemisphere [2]. In these freshwater environments, populations have rapidly evolved a number of traits  
35 that distinguish them from the ancestral marine form. While adaptation to each lake or stream is  
36 independent, several traits have evolved repeatedly across multiple freshwater systems either through  
37 parallel, convergent, or distinct genetic changes (e.g., changes in body shape, skeletal armor, dentition,  
38 behavior, and pigmentation)[2–6]. The repeated evolution of similar phenotypes in freshwater systems is  
39 strong evidence that these traits reflect local adaptation and provide a powerful platform for studying the  
40 genetic architecture of adaptive phenotypic evolution [7–9].

41  
42 Mutations in *cis*-regulatory elements can change how nearby genes are regulated. Such mutations are  
43 thought to be an important substrate for adaptive evolution[10–12]. In contrast to protein-coding changes,  
44 *cis*-regulatory mutations can alter the expression of gene targets in tissue- or temporally- specific ways.  
45 As a consequence, *cis*-regulatory changes may be less constrained by the deleterious side-effects of  
46 negative pleiotropy, making this class of mutations important targets for natural selection [10,11]. *Cis*-  
47 regulation has been shown to be the major driver of local environmental adaptation in recent human  
48 evolution [13], and likewise plays a central role in the local adaptation of sticklebacks to freshwater  
49 environments. Genome scans have found that genomic regions associated with recurrent divergence  
50 between ecotypes are predominantly intergenic, suggesting parallel divergence may often involve the  
51 reuse of pre-existing gene regulatory variation 1. Pirinen M, Lappalainen T, Zaitlen NA,  
52 GTEx Consortium, Dermitzakis ET, Donnelly P, et al. Assessing allele-specific expression  
53 across multiple tissues from RNA-seq read data. *Bioinformatics*. 2015;31: 2497–2504.  
54 doi:10.1093/bioinformatics/btv074

55 2. Mitsiadis TA, Pagella P, Cantù C. Early Determination of the Periodontal Domain by the  
56 Wnt-Antagonist Frzb/Sfrp3. *Frontiers in Physiology*. 2017;8. Available:  
57 <https://www.frontiersin.org/articles/10.3389/fphys.2017.00936>

58 3. Neves VCM, Babb R, Chandrasekaran D, Sharpe PT. Promotion of natural tooth repair  
59 by small molecule GSK3 antagonists. *Sci Rep*. 2017;7: 39654. doi:10.1038/srep39654

60 4. Wang C, Wang Y, Wang H, Yang H, Cao Y, Xia D, et al. SFRP2 enhances dental pulp  
61 stem cell-mediated dentin regeneration in rabbit jaw. *Oral Diseases*. 2021;27: 1738–1746.  
62 doi:10.1111/odi.13698

63 5. Fjeld K, Kettunen P, Furmanek T, Kvinnsland IH, Luukko K. Dynamic expression of  
64 Wnt signaling-related Dickkopf1, -2, and -3 mRNAs in the developing mouse tooth. *Dev Dyn*.  
65 2005;233: 161–166. doi:10.1002/dvdy.20285

66 6. Liu F, Chu EY, Watt B, Zhang Y, Gallant NM, Andl T, et al. Wnt/ $\beta$ -catenin signaling  
67 directs multiple stages of tooth morphogenesis. *Developmental Biology*. 2008;313: 210–224.  
68 doi:10.1016/j.ydbio.2007.10.016

69 7. Lin M, Li L, Liu C, Liu H, He F, Yan F, et al. Wnt5a regulates growth, patterning, and  
70 odontoblast differentiation of developing mouse tooth. *Dev Dyn*. 2011;240: 432–440.

71 doi:10.1002/dvdy.22550

72 8. Løes S, Luukko K, Hals Kvinnsland I, Salminen M, Kettunen P. Developmentally  
73 regulated expression of Netrin-1 and -3 in the embryonic mouse molar tooth germ.

74 *Developmental Dynamics*. 2003;227: 573–577. doi:10.1002/dvdy.10317

75 [8]. *Cis*-regulatory mutations have been implicated in specific morphological differences between marine  
76 and freshwater forms, including the loss of pelvic spines [14], bony armor plates [7], changes in  
77 pigmentation[4], and increased pharyngeal tooth number [6,15]. While these lines of evidence suggest an  
78 important role for gene regulatory evolution in stickleback adaptation, the global *cis*-regulatory landscape  
79 of marine-freshwater divergence remains poorly understood. Exploration of *cis*-regulatory changes  
80 between ecotypes has largely been limited to assaying individual gene targets in a small number of tissues  
81 (e.g., [6,7,16,17]). Transcriptome-wide *cis*-regulatory divergence between marine and freshwater fish has  
82 been characterized in two tissues so far: the gills[18] and ventral pharyngeal tooth plates [19].  
83 Surprisingly, these two tissues showed highly divergent regulatory landscapes[18], suggesting tissue-  
84 specific regulatory architecture may play an important role in stickleback adaptation.

85  
86 Here we survey global *cis*-regulatory divergence between marine and freshwater sticklebacks in seven  
87 tissues to understand the role of gene expression evolution in adaptive divergence. To characterize *cis*-  
88 regulatory changes between ecotypes, we crossed marine and freshwater fish to generate F1 hybrids. As  
89 F1 hybrids carry both a marine and freshwater copy of each chromosome, alleles from both parents are  
90 present in the same cellular environment (e.g., subject to the same *trans*-acting factors). Expression  
91 differences between the two parental alleles (i.e., allele-specific expression) can therefore only result from  
92 *cis*-regulatory changes [20,21]. We use this approach to examine a collection of tissues important for  
93 behavioral, physiological, feeding, and morphology differences between marine and freshwater forms  
94 (i.e., brain, liver, eyes, flank skin, dorsal and ventral pharyngeal tooth plates, and mandible). As  
95 morphological changes include especially dramatic changes to the craniofacial skeleton and  
96 dentition[6,22], likely reflecting adaptations to different diets in freshwater, we also examine a second  
97 developmental timepoint in dental tissues to characterize *cis*-regulatory modifications during  
98 development. We use these data to dissect the landscape of *cis*-regulatory divergence and then ask  
99 whether these changes are associated with genomic signals of selection. Overall, our results highlight the  
100 importance of the tissue- and developmental stage-specific *cis*-regulatory changes in marine-freshwater  
101 divergence and the importance of *cis*-regulatory variation in local adaptation.

102

## 103 **Results and Discussion**

### 104 *Extensive allele-specific expression across tissues in freshwater-marine hybrids*

105 To investigate *cis*-regulatory divergence between marine and freshwater individuals, we analyzed allele-  
106 specific expression in F1 hybrids between marine and freshwater fish (freshwater Paxton lake benthic  
107 [PAXB] x marine Rabbit Slough [RABS])(Figure 1A). Seven tissues were collected from F1 hybrids at  
108 the young adult stage (~35 millimeters [mm] standard length [SL]) (brain, eyes, liver, flank skin, ventral  
109 pharyngeal tooth plate [VTP], dorsal pharyngeal tooth plate [DTP], mandible) (Figure 1A-B).  
110 Additionally, three dental tissues (mandible, VTP, and DTP) were also collected from full-siblings at an  
111 earlier juvenile stage (15-20mm SL) for a temporal comparison of dental development (hereafter, “early”  
112 vs. “late” developmental timepoint). We sequenced mRNA from each tissue for two biological replicates,  
113 obtaining a median of 66.7 million reads per sample (Tables S1, S2). To phase heterozygous sites in F1s,  
114 we also performed whole-genome sequencing of the freshwater parent (PAXB) to an average coverage of  
115 ~30X (Figure S1).

116  
117 Principal component (PC) analysis of gene-wise mRNA abundance and allele-specific expression (ASE)  
118 revealed tissue-type to be the primary driver of variation (Figures 1B and S2). Allele-specific expression  
119 values clustered largely by tissue of origin on PC1 and PC2 (PC1: 52% of the variation, PC2: 30% of  
120 variance). Dental tissues formed their own cluster to the exclusion of other tissues, as did eyes and brain.  
121 Flank skin, where bony lateral plates develop, also formed a group with dental tissues on PC1 (Figure  
122 1B). PC analysis of allele-specific expression of dental tissue timepoints also separated samples based on  
123 developmental stage (early vs. late) on PC1 or PC2 (Figure S3).

124  
125 Extensive ASE was found across tissues (Figure 1C-D). Nearly 33% of genes (4,411) were found to have  
126 significant ASE in at least one tissue or tissue-timepoint (DESeq2 Wald-test, FDR<0.05, see Table S3,  
127 Figure 1D; 13,551 genes tested). In each tissue, these ASE genes accounted for approximately 5-12% of  
128 genes surveyed. Dental tissues had the greatest number of ASE genes overall, particularly at the earlier  
129 developmental timepoint (Figure 1D). The lowest number of ASE genes was identified in the brain (714  
130 genes, 5.6%). The number of ASE genes identified in a tissue was not related to differences in read depth  
131 between tissues (Figure S4).

132  
133 Comparing overlap of genes with ASE between tissues, we found that the largest distinct groups were  
134 tissue-specific rather than shared, indicating largely tissue-specific *cis*-regulatory divergence between  
135 marine and freshwater fish (Figure 1E). Across the seven tissues sampled at the late timepoint (SL  
136 ~35mm), 1,660 genes showed ASE in only one tissue (48% of genes with ASE overall). In particular, the  
137 liver was found to have the greatest number of unique ASE genes (366 genes, 32% of genes with ASE in  
138 liver). Comparisons between tissues also revealed many genes with evidence for shared ASE (Figure 1E).

139 In particular, we found high overlap between eyes and brain (29% shared), between dental tissues (36%-  
140 44%), and between dental tissues and flank skin (32%-36%)(Table S4). In contrast, few genes (~2%)  
141 showed ASE across all tissues (78 genes across all tissues, 92 genes at the late developmental timepoint).  
142 For genes with ASE in multiple tissues, directionality was typically maintained, with only 236 genes  
143 showing a change in which parental allele was upregulated between tissues.

144

#### 145 ***Widespread heterogeneity in allele-specific expression across tissues in marine-freshwater hybrids***

146 Comparisons of ASE across tissues revealed abundant *cis*-regulatory divergence between marine and  
147 freshwater fish. To investigate variation in allele-specific expression between tissues in marine-freshwater  
148 hybrids, we employed a Bayesian approach to partition genes in a tissue into three states – no ASE,  
149 moderate ASE, and strong ASE – based on the numbers of reads supporting the marine and freshwater  
150 allele [23]. Tissues are further classified as showing ASE heterogeneity if the strength of ASE varied  
151 across tissues (e.g., ASE is present in some tissues but absent in others or varies in magnitude between  
152 different tissues). Finally, we consider a sub-state of ASE heterogeneity to be tissue-specificity, where the  
153 ASE state (i.e., moderate, strong ASE, or no ASE) is observed in only one tissue despite expression of the  
154 gene across multiple tissues. Consequently, tissue-specificity describes cases where ASE state is unique  
155 to a single tissue.

156

157 We found that heterogeneity in ASE between tissues was common. Comparing across the seven different  
158 tissues collected at our second timepoint, we found that 44% of genes with ASE were classified as having  
159 heterogeneous ASE at a posterior probability (PP)>0.9 (at PP>0.95, 38%)(Figure 2A; Full list in File S1).  
160 Nearly all the genes with ASE heterogeneity (99%) did not show ASE in at least one of the tissues  
161 surveyed, with the remaining 1% showing evidence for ASE of varying magnitudes across all tissues.  
162 Evidence of tissue-specificity was also found for 448 genes (PP>0.9, File S1)(Figure 2B). Liver harbored  
163 the greatest number of genes with tissue-specific ASE (141 genes), followed by the eyes (66 genes).  
164 Repeating this analysis to incorporate dental tissues from the early timepoint and late timepoint, we also  
165 identified 73 genes with developmental- and tissue- specific ASE in tissues from the early developmental  
166 stage (File S1). Overall, allele-specific expression across tissues was found to be highly heterogeneous,  
167 likely reflecting tissue-specific *cis*-regulatory differences between marine and freshwater individuals.

168

169 Several genes with tissue-specific ASE were of interest for their reported tissue-specific functions in other  
170 systems (File S1). For example, *Dgat2* was expressed in five tissues at the second timepoint but found to  
171 have liver-specific ASE (Figure 2C). *Dgat2* is involved in triglyceride synthesis and plays an important  
172 role in energy metabolism; in mammals and zebrafish, gene mutants are associated with fatty liver

173 [24,25]. In dental tissues, genes with tissue-specific expression include a number of genes involved in  
174 tooth and bone formation (e.g., *Spp1*, *Dlx1a*, *Odam*, *Sox2*, *Epha3*, *Ssuh2rs1*, *Tgfbr2b*, *Stc2a*)(File S1).  
175 *Stc2a*, which was found to have tissue-specific ASE in the early mandible, was also recently shown to  
176 underlie changes in pelvic spine length between stickleback populations [16].

177

### 178 ***Temporal differences in allele-specific expression during dental development***

179 Marine and freshwater sticklebacks show a number of phenotypic differences associated with feeding  
180 morphology (e.g., larger jaws, more teeth), likely reflecting adaptations to larger prey found in the benthic  
181 zone of lakes [2,26]. Divergence in tooth number arises during late development, providing an  
182 opportunity to study *cis*-regulatory divergence in the context of developmental evolution [6,19,27]. To  
183 investigate *cis*-regulatory divergence during dental development, we examined ASE in three dental  
184 tissues at two developmental timepoints (Figure 3A).

185

186 Developmental stage was a major component of variation in allele-specific expression. Principal  
187 component analysis of marine-freshwater allelic log<sub>2</sub> fold changes clustered tissues by timepoint, with late  
188 and early dental tissues forming separate clusters on PC2 (22% of the variance, Figure S5). PC analysis of  
189 allele-specific counts from individual tissues also clustered tissues based on developmental timepoint on  
190 either PC1 (mandible and DTP, 50% and 48% of variance, respectively) or PC2 (VTP, 33% of  
191 variance)(Figure S3).

192

193 In contrast to our comparison of more diverse tissues, dental ASE was often shared across tissues or  
194 developmental stages (Figures 3B, S6). Nearly 10% of genes with ASE in dental tissues (330/3471 genes)  
195 showed ASE in all three dental tissues and at both developmental timepoints. Overall, a greater  
196 proportion of genes with ASE were shared across dental tissues in late development compared to early  
197 development: 19% of ASE genes (564 genes) were shared across all three tissues in the early stage versus  
198 26% (528 genes) in the late stage (Chi-square test,  $P=0.002$ ). Examining stickleback orthologs of genes  
199 implicated in mammalian tooth development collected from the Bite-It and ToothCode databases  
200 (hereafter referred to as “BiteCode” genes [19]), we found that these genes were enriched for ASE  
201 (Fisher’s exact test,  $P=0.0046$ )(Figure S5B). BiteCode enrichment is consistent with the conservation of  
202 regulatory networks regulating dental development in mammals and fish [28,29].

203

204 Next, we characterized developmental differences in *cis*-regulatory divergence by comparing ASE  
205 between timepoints. Across developmental stages, divergent ASE can reflect the activity of temporally-  
206 specific genes controlled by divergent *cis*-regulatory elements between marine and freshwater fish (Figure



207 3A). Comparing the ratio of marine to freshwater allelic counts between early and late development in  
208 hybrids, we observed widespread differential allele-specific expression between the two developmental  
209 stages for each tissue, accounting for 37-43% of genes with ASE at either timepoint (Figure 3C)(Fisher's  
210 exact tests, FDR<0.05; see Methods). The majority of differential ASE reflected ASE that was timepoint  
211 specific, meaning ASE was only observed at one developmental stage. However, roughly a quarter of  
212 differential ASE in each tissue was due to changes in the magnitude of ASE between timepoints.

213

214 More genes with differential ASE were found to have a larger *cis*-effect at the early stage than the late  
215 stage (i.e.,  $|\log_2 \text{fold change in early}| > |\log_2 \text{fold change in late}|$ ); Figure 3C), consistent with the greater  
216 proportion of genes with ASE at the early timepoint overall (Figure 1D). This result was surprising, as  
217 greater phenotypic divergence is observed between marine and freshwater fish in the pharyngeal tooth  
218 plates in late development [27]. Developmental differences were also typically tissue-specific: 67% of  
219 genes with developmental stage-bias ASE were unique to one tissue. Thus, *cis*-regulatory differences  
220 between marine and freshwater individuals are often specific to both tissue and tissue-developmental  
221 stage.

222

### 223 ***Polygenic selection on cis-regulatory divergence between marine and freshwater sticklebacks***

224 *Cis*-regulatory changes between marine and freshwater sticklebacks are potentially interesting for their  
225 role in local adaptation [8]. However, the majority of *cis*-regulatory changes are expected to be neutral.  
226 To test for selection on *cis*-regulatory changes between marine and freshwater fish, we employed a gene-  
227 set approach based on the sign test framework [30,31]. Under neutrality, QTLs for any given trait are  
228 expected to be unbiased with respect to their directionality, assuming these QTLs are independent (i.e.  
229 caused by different genetic variants) [32]. In a marine/freshwater genetic cross, each allele would be  
230 expected to be equally likely to increase the trait value if that trait is not under lineage-specific selection.  
231 Similarly, if a gene set associated with a biological function shows a significant directional bias in ASE  
232 (with more *cis*-changes acting in the same direction than expected), this suggests lineage-specific  
233 selection on the *cis*-regulation of this gene set [30,31]. Applying the sign test to GO gene sets in  
234 individual tissues and in the combined dental tissue set, we identified multiple gene sets with evidence for  
235 biased directionality (full list in Tables S5, S6).

236

237 In the combined dental tissue set, we found biased directionality for the GO terms “canonical Wnt  
238 signaling pathway” (Permutation based  $P$ -value = 0.0078), “embryonic viscerocranium morphogenesis”  
239 ( $P$  = 0.0093), and “Inflammatory response” ( $P$  = 0.0095). Wnt signaling plays a critical and  
240 evolutionarily conserved role in tooth and bone development [33,34] and genes in this pathway with ASE

241 have been directly implicated in regulating dental development in other species (e.g., *Wnt5a*, *Sfrp2*,  
242 *Ctnnb1*, *Net1*)(Table S7). While the GO annotation term included both positive and negative regulators of  
243 Wnt signaling, the pathway “Negative regulation of canonical Wnt signaling” was also nominally  
244 significant for biased downregulation of freshwater alleles (7/7 genes, Fisher’s exact test,  $P=0.0048$ ),  
245 suggestive of biased Wnt inhibition in marine fish (Figure 3D,E). Only three positive regulators of  
246 canonical Wnt signaling had ASE in dental tissues, precluding a separate statistical test of their  
247 directionality. As disruption or inhibition of canonical Wnt signaling results in arrested/aberrant tooth  
248 formation, selection on this pathway could potentially reflect selection for increased tooth number or  
249 related changes in feeding morphology in freshwater fish. Consistent with this, genes in the Wnt signaling  
250 pathway were previously shown to be upregulated in the VTP in PAXB freshwater compared to marine  
251 fish [19].

252  
253 The GO term “embryonic viscerocranium morphogenesis”, which encompasses a set of genes involved in  
254 the generation and organization of the facial skeleton, also included ASE genes directly implicated in  
255 tooth and jaw formation (Table S8). For instance, *Dlx3b* and *Dlx1a*, genes encoding members of the Dlx  
256 family of homeodomain transcription factors [35], are involved in tooth and jaw patterning in mammals  
257 and fish [36,37]. Thus, biased directionality of this process category may reflect selection for  
258 morphological changes to the freshwater fish in the facial region related to feeding morphology.

259  
260 We also found biased directionality for gene sets in individual tissues (Table S5). For instance, the GO  
261 category term “methyltransferase activity” ( $P=0.0018$ , 10/10 terms) showed biased upregulation of  
262 marine alleles in the eye and “endoplasmic reticulum” ( $P=0.0039$ , 38/50) showed biased upregulation of  
263 marine alleles in the flank skin. Since these gene sets are not yet associated with specific phenotypes, it is  
264 unclear what traits may have been impacted by their lineage-specific selection.

265

### 266 ***Overlap between signatures of selection and genes with cis-regulatory divergence***

267 If *cis*-regulatory changes underlie adaptive divergence between freshwater and marine forms, we may  
268 expect genes with ASE to fall within or near regions with signatures of selection. To test this hypothesis,  
269 we utilized a recent whole-genome analysis of differentiation between marine and freshwater populations  
270 from the northeast Pacific basin [9] (the source of the freshwater PAXB population studied here), where  
271 genomic regions of repeated marine-freshwater divergence were identified through marine-freshwater  
272 cluster separation scores (CSS). A CSS score quantifies average marine-freshwater genetic distance after  
273 subtracting the genetic distance found within each ecotype for a genomic window [8,9].

274



275 We asked whether genes with ASE co-localized with genomic regions with greater evidence for marine-  
276 freshwater divergence (i.e., greater CSS Z-scores). As power to detect ASE is related to the number of  
277 variant sites, we compared median CSS Z-scores between ASE and background genes with similar SNP  
278 densities (see Methods, Figure S7). Genes with ASE were associated with greater Z-scores per SNP  
279 density bin (Figure 4A,B; Permutation  $P < 0.0001$ ), indicating an enrichment of ASE genes in genomic  
280 regions with greater evidence for marine-freshwater divergence. This pattern is consistent with the  
281 hypothesis that repeated marine-freshwater divergence may often involve changes in gene regulation  
282 [8,18,18].

283  
284 Regions with significant CSS scores (EcoPeaks) overlapped 611 ASE genes (13.8% of ASE genes  
285 overall; 1.9-fold enrichment, Permutation test  $P < 0.001$ ) (Figure 4C, Table S9). Genes with evidence for  
286 ASE heterogeneity between tissues were enriched within EcoPeaks compared to all genes with evidence  
287 for ASE (Fisher's exact test,  $P = 0.01$ ), as were genes with evidence for tissue-specific ASE (Fisher's exact  
288 test,  $P = 0.018$ ).

289  
290 Marine-freshwater EcoPeaks are clustered throughout the genome, which is thought to reflect selection on  
291 linked "supergene" complexes affecting multiple traits [9,38]. We also find that genes with ASE are  
292 enriched on particular chromosomes (Figures S8, S9; see Methods). EcoPeaks and QTL associated with  
293 phenotypic divergence are particularly concentrated on ChrIV and this chromosome also harbored the  
294 highest proportion of ASE genes over background (Permutation  $P < 0.001$ ) as well as a quarter of EcoPeak  
295 ASE genes (154 genes). A more modest enrichment of ASE genes was also found for chrXXI ( $P = 0.034$ )  
296 and chrXI ( $P = 0.033$ ), which have been shown to harbor inversions between marine and freshwater fish  
297 [8]. We identified 56 and 48 ASE genes within EcoPeaks on these chromosomes, respectively.

298  
299 To identify potential candidate genes for marine-freshwater divergence, we overlapped ASE genes  
300 identified in marine-freshwater peaks with QTL for dental and skeletal traits [6,22,39] (Figure 4C,D).  
301 QTL for variation in dental traits between PAXB freshwater and marine fish (e.g., VTP or DTP tooth  
302 plate size and shape, tooth number, and jaw size and shape) overlapped 401 genes with ASE in relevant  
303 tissues (File S1). A small subset of these have previously been implicated in dental or craniofacial  
304 morphology in other species (Table 1), including several genes involved in the Wnt signaling pathway  
305 identified in the sign test (e.g., *Wnt5a*, *Sfrp2*, *Ctnnb1*, *Net1*).

306  
307 **Conclusions**

308 Changes in gene expression regulation are thought to play a major role in evolutionary adaptation. Here,  
309 we surveyed allele-specific expression across tissues and developmental stages to understand the  
310 landscape of *cis*-regulatory divergence between marine and freshwater sticklebacks. We identified  
311 widespread ASE that was largely heterogeneous between tissue types and developmental stages. For a  
312 subset of these *cis*-regulatory changes, we found evidence for polygenic selection on particular  
313 processes/pathways with a sign test. Finally, we demonstrated that *cis*-regulatory changes are often  
314 associated with regions of marine-freshwater divergence, further supporting the role of *cis*-regulatory  
315 differences in adaptive evolution in sticklebacks [8,9].

316  
317 Our results indicate the *cis*-regulatory divergence between marine and freshwater fish is often specific to  
318 an individual tissue or developmental stage. Gene expression differences that are spatially or temporally  
319 restricted may be important in the process of adaptation to new environments. Through context-specific  
320 expression regulation, *cis*-regulatory mutations can avoid negative pleiotropy associated with global  
321 changes in expression or protein structure. Thus, it is possible that *cis*-regulatory variation that introduces  
322 discrete changes in gene expression may be favored during adaptation. Interestingly, we found that genes  
323 with evidence for tissue-specific ASE in particular were enriched in regions of recurrent marine-  
324 freshwater divergence. Tissue- or context- specific *cis*-regulatory differences have previously been shown  
325 to underlie adaptive traits in sticklebacks [4,14] and other systems[40]. The tissue- and developmental-  
326 specificity of *cis*-regulatory changes we identified between marine and freshwater sticklebacks highlights  
327 the utility of studying gene regulation across multiple tissues and contexts in understanding regulatory  
328 adaptation.

329  
330 Genes with ASE in regions of repeated marine-freshwater divergence may be interesting candidates for  
331 adaptive phenotypic differences between ecotypes. *Cis*-regulatory changes have been found to underlie a  
332 number of phenotypic differences between marine and freshwater forms. For example, *cis*-regulatory  
333 changes at *Bmp6* are associated with evolved tooth gain[6,15], and *cis*- regulatory changes at *Eda* and  
334 *GDF6* have been implicated in skeletal differences between marine and freshwater fish[7,41]. While we  
335 did not have sufficient expression to examine ASE at these genes specifically (e.g., *Eda*, *GDF6*, *Bmp6*) in  
336 our dataset, we identified a number of potentially interesting candidate genes within differentiated  
337 genomic regions with ASE. For example, *cis*-regulatory variation at *Stanniocalcin2a* (*Stc2a*) was recently  
338 associated with changes in spine length in freshwater sticklebacks [16]. We found that *Stc2a* also showed  
339 ASE in the early mandible timepoint. *Stc2a* falls within a marine-freshwater divergent region on ChrIV  
340 that overlaps several QTL, including the QTL with the largest effect on dentary size in crosses between  
341 PAXB freshwater fish and marine fish [22]. In mice, *Stc2a* modulates bone size and growth and

342 overexpression results in smaller mandibles[42,43], making this gene an exciting candidate for divergent  
343 jaw morphology between marine and freshwater benthic fish. Our results also highlighted Wnt signaling  
344 genes as potential candidates for divergence in feeding morphology. A sign test indicated evidence for  
345 lineage-specific selection on *cis*-regulatory alleles involved in Wnt signaling, and several of these genes  
346 were also found within QTL/EcoPeaks and involved in tooth development or craniofacial morphology  
347 (see Table S1). For example, *Wnt5a*, associated with QTL for tooth plate and dentary shape, plays an  
348 important role in facial and tooth development in mammals [44–46]. Our results establish the landscape  
349 of stickleback *cis*-regulatory divergence across tissues and developmental stages; we look forward to  
350 future studies that elucidate the roles that specific ASE genes have played in stickleback adaptation.

351

## 352 **Methods**

### 353 ***Stickleback husbandry***

354 All animal work was approved by UC Berkeley IACUC protocol AUP-2015–01-7117. Fish were raised in  
355 aquaria at 18°C in brackish water (3.5g/L Instant Ocean salt, 0.217mL/L 10% sodium bicarbonate) with 8  
356 hours of light per day. Fry (SL < 10mm) were fed live *Artemia*, early juveniles (SL ~10-29 mm) were fed  
357 live *Artemia* and frozen *Daphnia*. Fish above ~20mm were fed frozen bloodworms and *Mysis* shrimp. To  
358 generate F1 hybrids, a freshwater Paxton Benthic (Paxton Lake, Canada) strain male was crossed with a  
359 marine Rabbit Slough (Alaska) strain female. Individuals from these lineages have been maintained in the  
360 lab for >10 generations. The resulting full-sibling fish were raised together in a common dish or tank until  
361 sample collection. Female F1 hybrids were selected for dissection at two timepoints (15-20 mm SL and  
362 35mm SL). Fish were euthanized individually via immersion in 250 mg/L MS-222. Tissue samples for  
363 RNA-seq were immediately dissected on an ice-cold tray. Brain samples included all bilateral brain  
364 regions from the olfactory bulb to the brain stem. Liver samples were derived from the anteriormost lobe  
365 of the fish liver. Eye samples encompassed the entirety of the left eye of each fish, including the majority  
366 of the optic nerve. Flank skin samples were taken by removing the majority of the skin covering the left  
367 side of each fish, capturing a region that would normally be covered by lateral armor plates in adulthood  
368 (anteriormost boundary at the level of the 1<sup>st</sup> dorsal spine, where the anteriormost armor plates had begun  
369 ossification at the time of dissection, posterior boundary at the back of the dorsal fin where armor plates  
370 were not yet ossified). Dorsal pharyngeal tooth plate samples included left and right DTP1 and DTP2, as  
371 well as underlying epibranchial bones and surrounding soft tissues and teeth. Ventral pharyngeal tooth  
372 plate samples included left and right ceratobranchial 5 and surrounding soft tissues and teeth. The  
373 mandible consisted of the dentary bone and lower lip, and all associated soft tissues and teeth. Samples  
374 were placed into 50 ul of TRIzol (Invitrogen), briefly agitated by shaking, and incubated on ice for 10  
375 minutes. All samples from each timepoint were all prepared on the same day.

376

377 ***RNA extraction, library preparation, and sequencing***

378 Dissected tissues were kept in TRI reagent and stored in -80°C prior to RNA-extraction. Total RNA  
379 extraction was performed as described previously [19]. Total RNA was quantified by Qubit Fluorometer,  
380 and quality was checked by Agilent Bioanalyzer. Libraries were constructed with New England Biolabs  
381 NEBNext Poly(A) mRNA Magnetic Isolation Module (E7490S), NEBNext Ultra II Directional RNA  
382 Library Prep Kit (E7765S) and NEBNext Multiplex Oligos for Illumina (96 Unique Dual Index Primer  
383 Pairs, E6440S) following the manufacturer's instructions. Library quality was analyzed on an Agilent  
384 Bioanalyzer (Table S1). Libraries were pooled and sequenced on an Illumina HiSeq platform (2x150 bp  
385 reads). We obtained a total of 1,439,700,457 reads across 20 samples (10 tissues x 2 replicates) (Table  
386 S1).

387

388 ***Whole-genome re-sequencing of PAXB***

389 To phase RNA-seq reads, whole-genome resequencing was performed on the PAXB parent. DNA was  
390 extracted from fin tissue. Library preparation and sequencing were performed by Admera Health (South  
391 Plainfield, NJ). Libraries were sequenced on an Illumina HiSeqX platform (2x150 bp reads) to a depth of  
392 ~30X (Figure S1). Coverage per site was calculated with Samtools depth [47] based on reads aligned to  
393 the reference genome (described below).

394

395 ***Read mapping and SNP calling***

396 RNA-seq read quality was assessed using FastQC. Reads were trimmed for adaptor sequences with  
397 Trimmomatic[48] and then mapped to the stickleback reference genome [49]. F1 hybrid RNA-seq reads  
398 were mapped to the stickleback reference genome with STAR v2.7 [50]. Genomic reads from PAXB  
399 were mapped with bowtie2 v2.3.4 (argument: --very-sensitive)[51].

400

401 SNP calling was then performed with the Genome Analysis Tool Kit (GATK)[52]. Duplicates were  
402 marked with the Picard tool MarkDuplicates. Read groups were added with AddOrReplaceReadGroups.  
403 For RNAseq reads, we used GATK tool SplitNCigarReads to split reads that contain Ns in their cigar  
404 string (e.g., spanning splice events). GATK HaplotypeCaller and GenotypeGVCFs were used for joint  
405 genotyping. SNP calls were subsequently filtered for low quality calls with VariantFiltration (QD < 2.0;  
406 QUAL < 30.0; FS > 200; ReadPosRankSum < -20.0).

407

408 To assign allele-specific reads to the parent of origin (i.e., “freshwater” parent vs. “marine” parent), we  
409 retained only variants where the PAXB parent was homozygous. Heterozygous sites for each F1

410 individual were used for separating allele-specific RNA-seq reads into freshwater and marine pools, as  
411 described below.

412

### 413 *Identifying allele-specific expression*

414 To identify allele-specific expression (ASE), reads from each library were then mapped again with STAR,  
415 implementing the WASP filter based on heterozygous calls [53]. WASP reduces mapping bias by  
416 identifying reads containing SNPs, simulating reads with alternative alleles at that locus, re-mapping  
417 these reads to the reference, and then flagging reads that do not map to the same location. Reads that do  
418 not map to the same location were discarded[53]. Parental origin for each allele was assigned based on  
419 PAXB (freshwater parent, see above). Reads were counted over marine-freshwater variants with  
420 ASEReadCounter [52] for individual heterozygous sites. To mitigate the effects of SNP calling errors and  
421 read mapping bias, we removed heterozygous sites with: 1) large ratio differences indicative of mapping  
422 bias ( $\log_2$  fold changes of allelic counts  $> 10$ ), or 2) no reads mapped to one of the parental alleles.  
423 Mapping was then repeated a second time based on the updated list of heterozygous sites. Analysis of  
424 ASE ratios in each library centered around a  $\log_2$  ratio of zero, indicating approximately equal mapping to  
425 both parental alleles.

426

427 Gene-wise estimates of allele-specific expression were quantified by counting allele-specific reads  
428 overlapping exons using HTSeq [54] based on Ensembl annotations (BROAD S1) [8], with coordinates  
429 converted by LiftOver to the v4 stickleback assembly  
430 (<https://stickleback.genetics.uga.edu/downloadData/>)[49]. Total counts per parental allele per tissue are  
431 available in Table S2. Across tissues, we did not observe a consistent bias towards either of the parental  
432 alleles. To examine transcriptome-wide patterns of expression, we transformed expression values (allele-  
433 specific and total counts) using variance stabilizing transformation and assessed transcriptome-wide  
434 expression patterns via principal components analysis (PCA)(Figures 1B, S2).

435

436 DESeq2 [55] was used to identify ASE using the individual as a blocking factor and allele-specific  
437 expression (“marine” vs. “freshwater” allele) as the variable of interest (Wald test). As read counts from  
438 “marine” and “freshwater” alleles come from the same sequencing library, library size factor  
439 normalization was disabled by setting SizeFactors = 1. *P*-values were adjusted using the Benjamini-  
440 Hochberg method in DESeq2 for multiple comparisons. Genes were examined at  $FDR < 0.05$  and  
441  $FDR < 0.1$  (Table S3). Comparing genes with ASE in VTP from the late timepoint with the results of Hart  
442 et al. [19], which also tested for ASE in crosses between PAXB and RABS in the VTP, we found highly  
443 significant overlap (Fisher’s exact test,  $P = 8.83 \times 10^{-292}$ ). Fifty-one percent of ASE genes identified here

444 were also identified in the previous analysis. Additionally,  $\log_2$  fold changes of genes with ASE were  
445 found to be correlated (Pearson's Correlation,  $r = 0.64$ ,  $P = 2.47 \times 10^{-69}$ ).

446  
447 Developmental stage differences in ASE were identified by comparing reads mapping to freshwater vs.  
448 marine alleles at both timepoints, summed across the two replicates. We compared marine and freshwater  
449 allelic ratios for genes with evidence of ASE in at least one of the two developmental stages with a  
450 Fisher's exact test. Resulting  $P$ -values were corrected using the Benjamini-Hochberg method.

451  
452 ***Assessing heterogeneity in allele-specific expression across tissues***

453 To identify heterogeneity in allele-specific expression across tissues, we adopted a Bayesian model  
454 comparison framework from Pirinen et al. [23]. In this approach, tissues are classified as no ASE ( $\theta(\mathcal{N})$ ),  
455 strong ASE ( $\theta(\mathcal{S})$ ), or moderate ASE ( $\theta(\mathcal{M})$ ) based on freshwater and marine allelic counts summed  
456 across replicates per gene under a grouped tissue model [23]. Tissues are further classified as showing  
457 ASE heterogeneity if one tissue showed evidence for either strong or moderate ASE and at least one other  
458 tissue did not show ASE (HET0) or when all tissues showed some evidence for ASE but the magnitude  
459 differed (HET1). Finally, we consider a sub-state of ASE heterogeneity tissue-specificity, where ASE  
460 state (i.e., moderate, strong ASE, or no ASE) is observed in only one tissue [23].

461  
462 The following priors were selected to describe groups:

463  
464 
$$\theta(\mathcal{N}) \sim \text{Beta}(2000, 2000)$$
  
465 
$$\theta(\mathcal{M}) \sim \frac{1}{2}\text{Beta}(80, 36) + \frac{1}{2}\text{Beta}(36, 80)$$
  
466 
$$\theta(\mathcal{S}) \sim \frac{1}{2}\text{Beta}(80, 7) + \frac{1}{2}\text{Beta}(7, 80)$$

467  
468 Densities of the prior distributions for the proportion of allelic counts are found in Figure S9. Parameters  
469 for Beta distributions were chosen to clearly separate the three groups from each other to allow the  
470 classification of tissues to a particular group, following Pirinen et al. [23]. The "No ASE" condition  
471 dominates the region around 0.5 (0.47, 0.53), allowing for some deviation for technical bias or noise  
472 [23, 56]. Strong ASE dominates at extreme frequencies ([0.85, 0.96], [0.3, 0.15]) and moderate ASE  
473 dominates between these two groups (Figure S9). Genes expressed in at least two tissues at a minimum  
474 depth of 10 reads/allele were included in the analysis (15,477 genes). For each gene, we excluded tissues  
475 for which coverage was low (less than or equal to 10 reads per allele).

476  
477 ***Sign test on ASE***



478 To search for selection on cis-regulatory variation, we applied a sign test based on the directionality of  
479 ASE in a gene set [30,31]. Gene Ontology (GO) categories for zebrafish were obtained from ZFIN  
480 (<https://zfin.org/downloads>)[57] and mapped to stickleback orthologs based on Ensembl ortholog  
481 annotations. Genes with evidence for *cis*-regulatory divergence were divided into categories based on the  
482 upregulated allele (freshwater vs. marine). We excluded GO categories with fewer than 10 members in a  
483 test set with ASE. As test sets contain different proportions of upregulated marine vs. freshwater alleles,  
484 we tested for lineage-specific bias in each test set with a Fisher's exact test.

485  
486 Because many GO categories were tested, we determined the probability of an enrichment by permuting  
487 gene category assignments, as described previously [30,31,58]. Gene assignments were shuffled and the  
488 test was repeated 10,000 times. Permutation-based *P*-values were determined by asking how often a result  
489 of equal or greater significance would be observed in permuted datasets [30,31,58]. Tests were performed  
490 on individual tissues and on the dental tissues together, as many genes with ASE are shared across these  
491 tissues. In the grouped tissue analysis, we looked for biased directionality across all genes with ASE in a  
492 tissue group. In the event that signs differ between tissues (i.e., freshwater allele is upregulated in tissue  
493 #1, marine allele is upregulated in tissue #2), the gene is discarded from the analysis. Changes in  
494 directionality across tissues was only seen for one gene associated with a significant GO term (dental  
495 tissue: "inflammatory response"). To ensure that biased directionality in our group analyses were robust  
496 to tissue-specific patterns, we performed a second test where we combined *P*-values for a tissue group  
497 from individual tissues with Fisher's method, as in [31]. We performed a Fisher's exact test for each  
498 category as described above for individual tissues. *P*-values for GO categories that are represented across  
499 all tested groups were then combined using the R package *metap*. We report on GO terms significant in  
500 both approaches, as these represent cases of biased directionality across tissue groups and robust to  
501 individual tissue patterns. Combined *P*-values are reported in Table S6.

502

### 503 ***Identifying overlap with EcoPeaks***

504 Data from Kingman et al. [9] was downloaded from the UCSC Genome Browser Table Browser  
505 ([22]: <https://sbwdev.stanford.edu/kingsleyAssemblyHub/hub.txt>). Intervals were associated with  
506 overlapping genes using *bedtools* [59]. As power to detect ASE is related to the density of informative  
507 sites, we calculated SNP density per gene as the number of informative heterozygous sites divided by  
508 transcript length, based on BROAD S1 gene annotations [9]. To determine whether genes with ASE had  
509 higher average Z-scores than background genes, while controlling for the effect of SNP density on our  
510 power to identify ASE, we grouped genes with similar SNP densities into bins based on the distribution  
511 of SNP density values. We excluded bins for which there were fewer than five genes in each category

512 (ASE, no ASE) so as not to skew results based on bins with few observations (330 bins, average of 23  
513 genes per bin)(Figure S8A). For each bin, we calculated the median Z-score for genes with ASE and for  
514 background genes (Figure S8B). We compared this result to a permuted dataset. Within a density bin, we  
515 shuffled gene category assignments and again calculated the median Z-score for each category in each  
516 bin. We repeated this 10,000 times. To obtain a permutation-based  $p$ -value, we compared how often the  
517 median difference in category Z-scores was as extreme or more extreme than in empirical data. This  
518 result was robust to varying bin sizes (Table S10).

519

520 To ask whether ASE genes were enriched on particular chromosomes, as with QTLs and EcoPeaks [9],  
521 we performed a resampling test to account for differences in SNP density between genes. We sampled  
522 random sets of genes (equal to the number of total ASE genes) with SNP densities matched to the ASE  
523 gene set (1000 times). The number of genes associated with each chromosome were counted for each  
524 permuted gene set and compared to the empirical data.  $P$ -values were calculated based on how often an  
525 equal or more extreme result was observed for permuted gene sets (Figure S9).

526

### 527 ***Gene annotations and QTL overlap***

528 Stickleback genes were annotated to zebrafish and mouse orthologs based on Ensembl ortholog  
529 annotations. BiteCode genes were annotated as in Hart et al. [19], from the BiteIt database ([http://bite-  
530 it.helsinki.fi/](http://bite-it.helsinki.fi/)) and ToothCODE database (<http://compbio.med.harvard.edu/ToothCODE/>). Phenotype  
531 annotations for zebrafish were downloaded from ZFIN (<https://zfin.org/downloads>), mouse mutant  
532 phenotypes were downloaded from Ensembl and the Mouse Genome Database[60].

533

534 QTL coordinates for overlap are based on genomic coordinates in Marques and Peichel [61]. For overlap  
535 with ASE genes, we focused on QTL mapping studies utilizing crosses between PAXB freshwater and  
536 marine individuals. Dental QTL for Table S1 and File S1 were obtained from three studies [6,22,39].  
537 Coordinates were converted by LiftOver to the v4 stickleback assembly for overlap with EcoPeaks. Genes  
538 of interest for Table 1 were identified based on intersections between these genes (ASE/EcoPeak/QTL)  
539 and phenotype/Gene Ontology annotations or the BiteCode gene list. A full list of gene overlaps is  
540 available in File S1.

541

### 542 **Data Availability**

543 All sequence data generated in this study have been deposited to the National Center for Biotechnology  
544 Information Sequence Read Archive as a BioProject (SUB12080818). Supplemental datasets are available

545 in File S1. Scripts associated with this manuscript are available on GitHub  
546 (<https://github.com/katyamack-hub/SticklebackASE>).

547

#### 548 **Funding**

549 This work was supported by the National Institutes of Health (R01-GM097171 to H.B.F., DE021475 to  
550 C.M. and DE027871 to T.S.) and the Ruth L. Kirschstein National Research Service Award Individual  
551 Postdoctoral Fellowship(F32) to K.L.M.

552

#### 553 **Supplemental Material**

554 Supplement Figures and Tables

555       Figures S1-S10

556       Tables S1-S10

557       Supplemental references

558

559 File S1: Supplemental gene lists

560 **Figures**

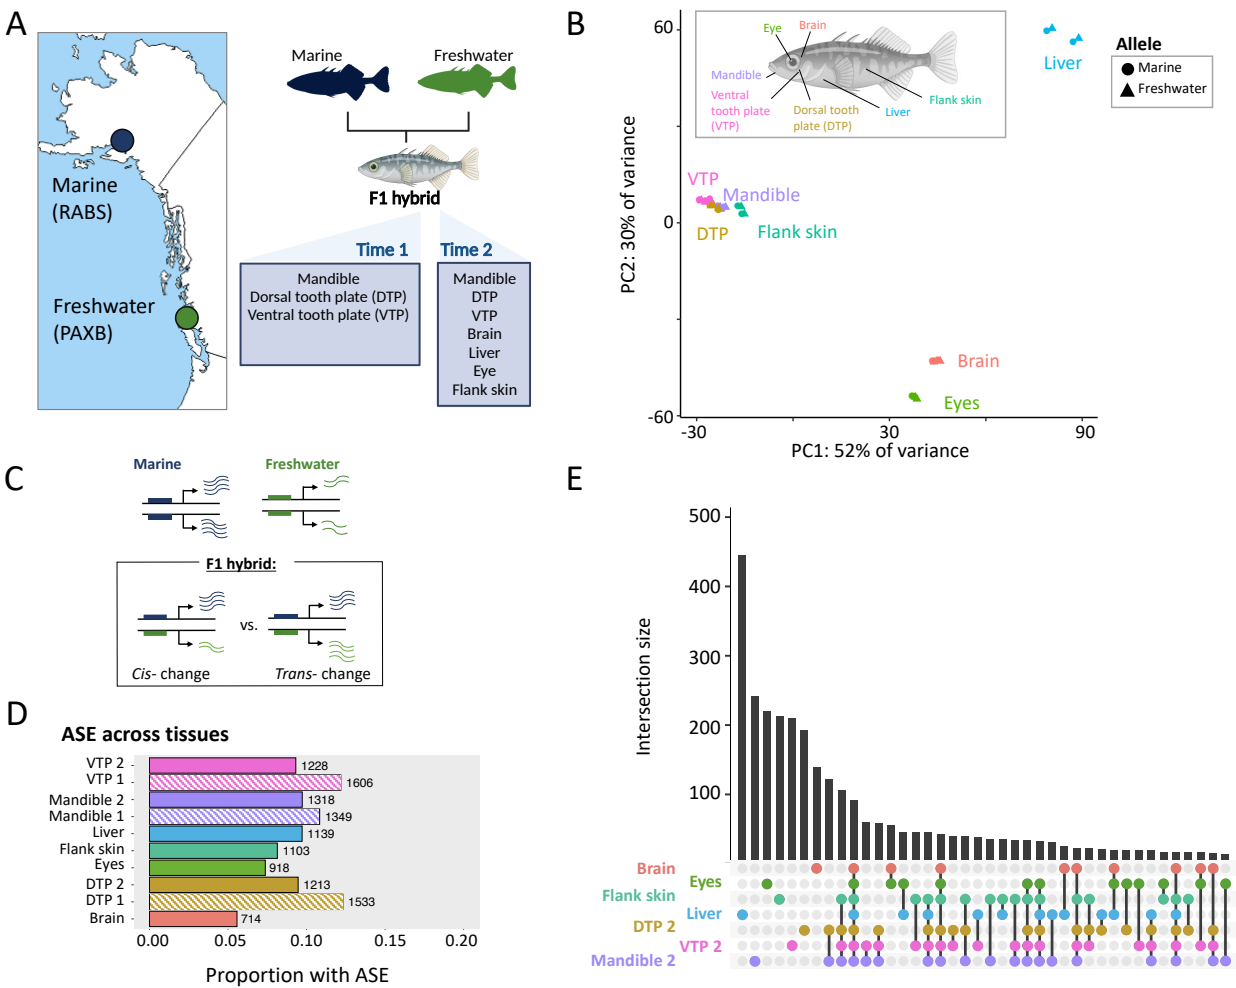

561  
 562 **Figure 1.** The *cis*-regulatory landscape of divergence between marine and freshwater stickleback. **A.** Marine  
 563 (RABS) and freshwater (PAXB) sticklebacks were crossed to produce F1 hybrids. Tissues were collected for  
 564 RNAseq across two developmental timepoints from full siblings. **B.** Principal component analysis of allelic counts  
 565 from marine-freshwater F1 hybrids. Allelic reads cluster by tissue of origin on PC1 and PC2. **C.** A schematic of how  
 566 regulatory divergence can be dissected with F1 hybrids. Here, a gene is upregulated in marine fish (wavy lines). In  
 567 an F1 hybrid, differential expression between the freshwater and marine allele (e.g., allele-specific expression, ASE)  
 568 indicates a *cis*-regulatory change. In contrast, equal expression of the two alleles indicates a *trans*-only change. **D.**  
 569 Numbers and proportions of genes with ASE across tissues. Striped bars indicate tissues from the early timepoint. **E.**  
 570 UpSet plot showing distinct intersections of genes with ASE across tissues from the late timepoint. A single dot in a  
 571 column indicates ASE specific to one tissue, whereas multiple dots connected by lines indicate ASE shared across  
 572 multiple tissues.  
 573

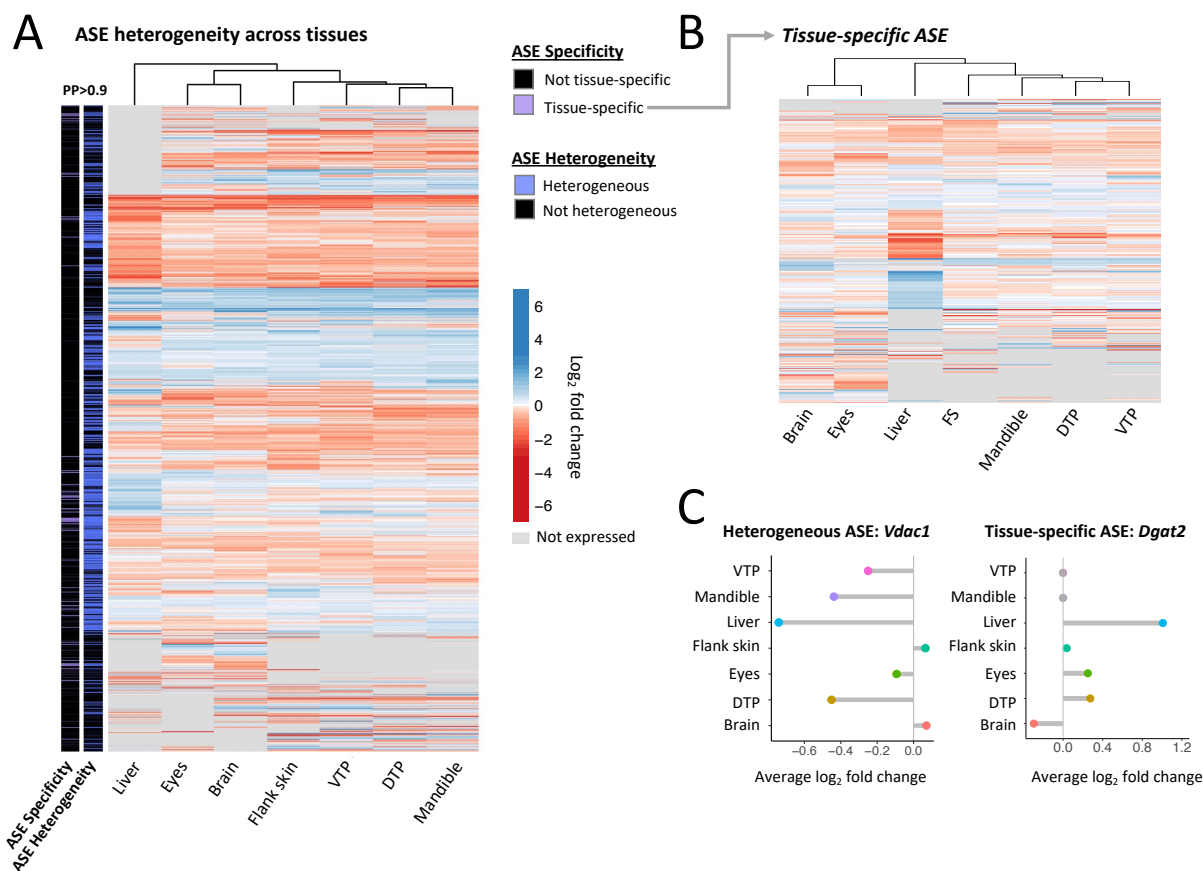

574  
 575 **Figure 2.** Heterogeneity of allele-specific expression across tissues. **A.** A heatmap of genes with evidence of allele-  
 576 specific expression in late development. The left bars indicate genes where ASE varies across tissues (in presence or  
 577 magnitude, “ASE Heterogeneity”) and substate of ASE heterogeneity where ASE patterns are specific to one tissue  
 578 (tissue-specific ASE, “ASE Specificity”) at a posterior probability of >0.9. Genes are colored by average log<sub>2</sub> fold  
 579 change in each tissue. Gray panels indicate the gene is not expressed in a given tissue. **B.** Heatmap of genes with  
 580 evidence for tissue-specific ASE. **C.** Examples of genes with heterogeneous ASE (*Vdac1*, left) and tissue-specific  
 581 ASE (*Dgat2*, right). ASE was observed for voltage-dependent anion channel *Vdac1* in some tissues (e.g., liver,  
 582 DTP2, mandible) but not others, where triglyceride synthesis gene *Dgat2* only shows evidence for ASE in liver.  
 583  
 584  
 585  
 586

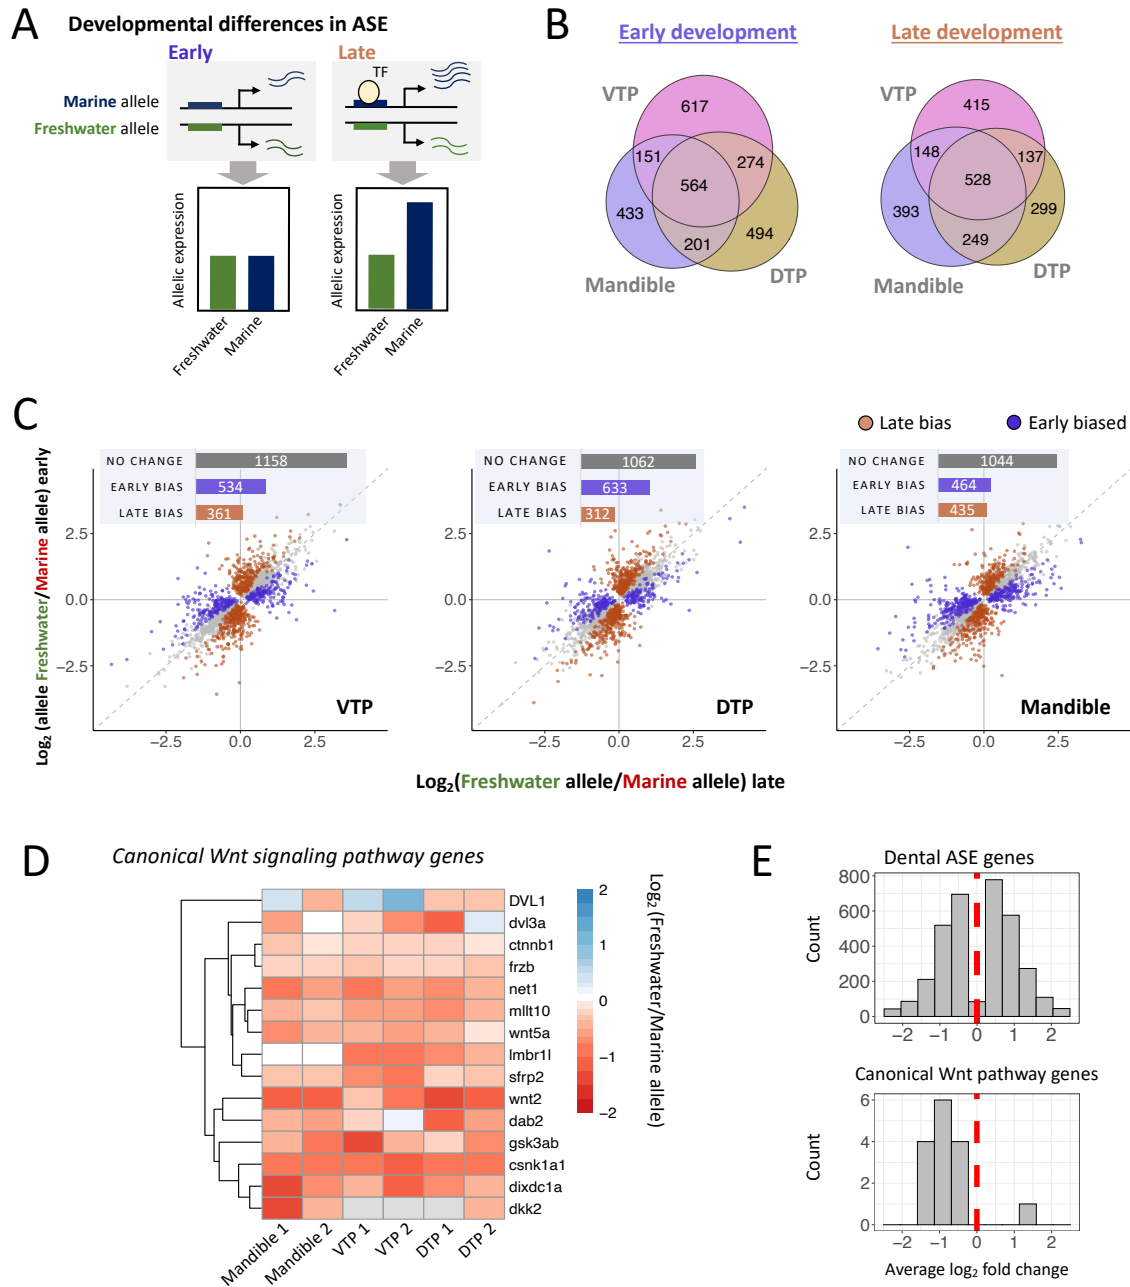

587  
 588 **Figure 3.** Developmental allele-specific expression in dental tissues. **A.** A schematic of differential ASE during  
 589 development. In this example, sequence divergence between marine and freshwater sticklebacks at a *cis*-regulatory  
 590 region results in allele-specific expression only in the presence of a context-specific transcription factor (“TF”,  
 591 circle) expressed during late development. This results in differential allele-specific between developmental stages,  
 592 shown in the bar plots. **B.** Venn diagram of ASE between dental tissues at the early (left) and late (right)  
 593 developmental timepoint. **C.** Temporal differences in ASE during development in three dental tissues (left to right:  
 594 ventral tooth plate, dorsal tooth plate, mandible). Genes with differential allele-specific between timepoints are  
 595 colored based on magnitude of ASE in timepoint 1 vs. 2. Genes with greater differences in allelic expression in early



596 development are shown in purple (“early bias”), genes with greater expression differences at the late timepoint are  
597 shown in terracotta (“late bias”). Gray points/bar (“no change”) indicate genes without evidence for significant  
598 differential allele-specific expression between timepoints. **D-E**. Genes involved in Canonical Wnt signaling show  
599 evidence of polygenic *cis*- regulatory evolution in dental tissues. Here we show genes from two Wnt signaling GO  
600 terms with biased directionality (Canonical Wnt signaling [GO:0060070]; Negative regulation of canonical Wnt  
601 signaling [GO:0090090]) (Table S7). In (**D**), the heatmap shows  $\log_2$  fold changes for genes associated with  
602 canonical Wnt signaling and with ASE in at least one dental tissue. In (**E**), histograms of average ASE gene  $\log_2$  fold  
603 changes from all dental genes (top) and the canonical Wnt signaling gene set (bottom). For each gene,  $\log_2$  fold  
604 changes are averaged across any dental tissues in which ASE was identified.  
605  
606  
607

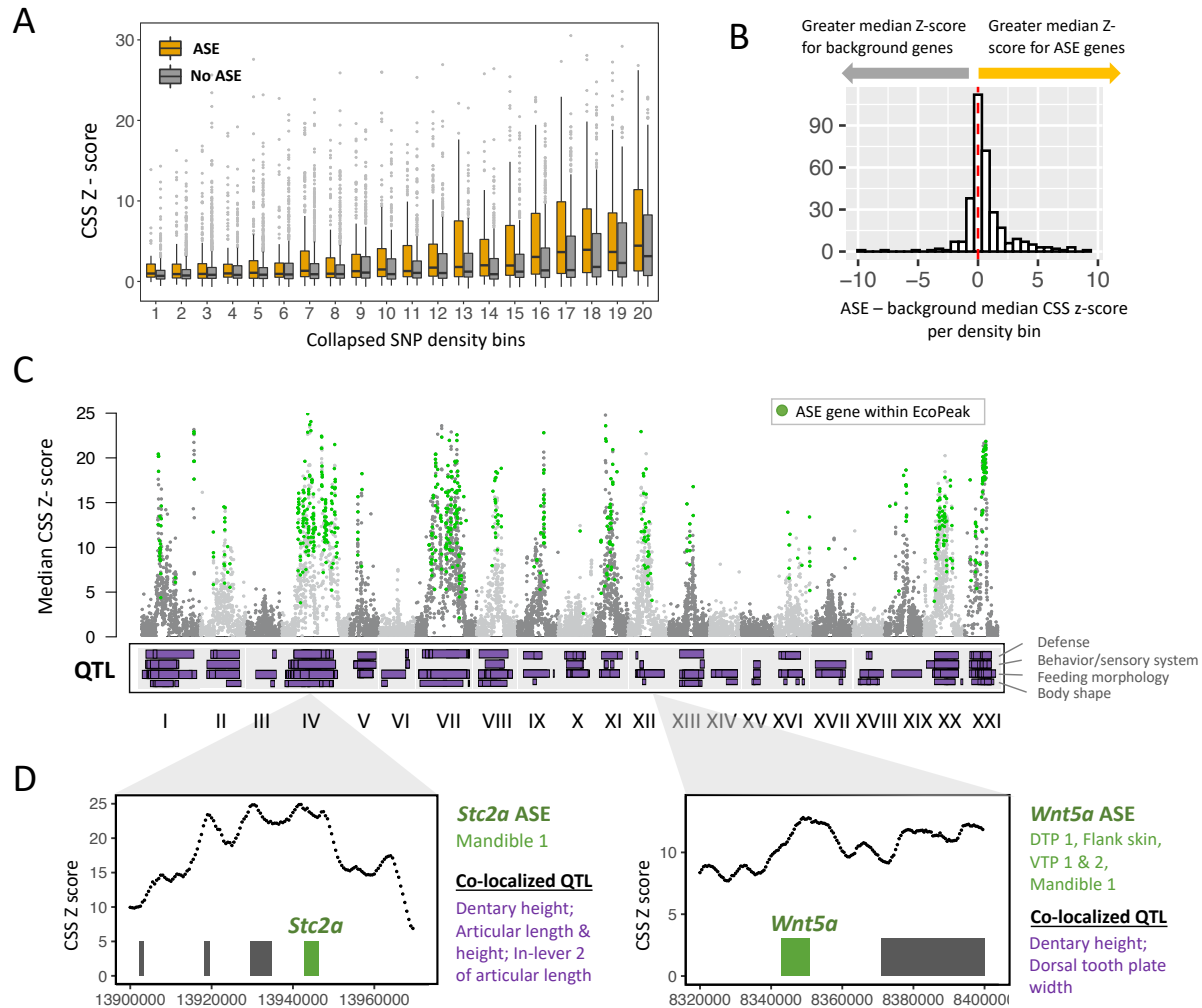

608  
 609 **Figure 4.** ASE genes are associated with regions of repeated marine-freshwater divergence. **A.** Average marine-  
 610 freshwater cluster separation score (CSS) Z-scores for ASE genes and background genes binned by SNP density.  
 611 Here, genes are separated into 20 density bins for visualization, with higher numbers corresponding to greater SNP  
 612 density. **B.** ASE genes have higher average CSS Z-scores than background genes. The histogram shows median Z  
 613 scores for ASE genes minus background genes for each SNP density bin. More density bins show positive values,  
 614 indicating higher average Z-scores for ASE genes overall (Permutation  $P < 0.0001$ ). **C.** Manhattan plot of median  
 615 gene CSS Z score vs. chromosome position. Highlighted in green are genes with ASE that overlap significant  
 616 regions of recurrent marine-freshwater divergence in the northeast Pacific basin (“EcoPeaks”). Below we show  
 617 locations of quantitative trait loci (QTLs) identified in previous genetic crosses between PAXB and marine fish.  
 618 QTL are divided into three broad categories (from top to bottom: defense, behavior and sensory system, feeding  
 619 morphology, and body shape). **D.** Two candidate ASE genes within regions of marine-freshwater divergence. ASE  
 620 was observed for *Wnt5a* and *Stc2a* in one or more dental tissues and these genes co-localize with QTL related to  
 621 feeding morphology. Bars in the panel indicate genes within these regions, with candidate genes *Wnt5a* and *Stc2a*  
 622 highlighted in green. Tissue(s) in which ASE was identified (green) and relevant overlapping QTL (purple) are  
 623 listed to the right of each gene panel.

624 **Table 1. Candidate ASE genes within differentiated regions with overlapping QTL**

| Gene           | Marine-Freshwater EcoPeak | ASE tissues                                        | QTLs <sup>1</sup>                                                                     | Relevant functions                             |
|----------------|---------------------------|----------------------------------------------------|---------------------------------------------------------------------------------------|------------------------------------------------|
| <i>Cldn4</i>   | chrI:16985780-17009145    | DTP 1 & 2, VTP 1, Mandible 1, Liver                | Tooth plate shape                                                                     | Tooth development [62]                         |
| <i>Igfbp5a</i> | chrI:26093586-26548184    | DTP 2                                              | Tooth plate shape                                                                     | Tooth development, bone development [63,64]    |
| <i>Scube1</i>  | chrIV:21368021-22019696   | DTP 1, VTP 1, Mandible 2, Eyes                     | Tooth number, jaw shape                                                               | Craniofacial development[65]                   |
| <i>Stc2a</i>   | chrIV:13853040-14033725   | Mandible 1                                         | Jaw shape                                                                             | Skeletal development [42]                      |
| <i>Net1</i>    | chrIV:21368021-22019696   | DTP 1, VTP 1 & 2, Mandible 1 & 2, Flank skin       | Tooth plate tooth number, jaw shape                                                   | Tooth development, bone development [66]       |
| <i>Kdm5a</i>   | chrIV:26410831-26967766   | VTP 1                                              | Tooth plate tooth number                                                              | Tooth development[67]                          |
| <i>Kdm6bb</i>  | chrVII:19682650-19906375  | DTP 1 & 2, VTP 1                                   | Tooth plate area and shape, tooth plate tooth number, dentary shape                   | Tooth development, bone development [68,69]    |
| <i>Cldnb</i>   | chrVII:21853746-22015247  | DTP 1 & 2, VTP 2, Mandible 1 & 2, Flank skin       | Jaw, dentary, and tooth plate shape, tooth plate tooth number, defense plates         | Tooth development [62]                         |
| <i>Postna</i>  | chrVII:22876973-23002851  | DTP 1 & 2, Flank skin, VTP 2, Mandible 1 & 2, eyes | Jaw shape, dentary shape, tooth plate shape, tooth plate tooth number, defense plates | Tooth development, bone development [70]       |
| <i>Kdm6ba</i>  | chrVII:8555721-8746343    | Mandible 1, Liver                                  | Jaw shape                                                                             | Bone development [69]                          |
| <i>Timp2b</i>  | chrXI:9651474-9924679     | DTP 1 & 2, Flank skin, eyes, liver                 | Tooth plate tooth number                                                              | Tooth development[71]                          |
| <i>Mmp9</i>    | chrXII:10684220-10754257  | DTP 2, Flank skin                                  | Tooth plate shape                                                                     | Tooth development, bone development [72,73]    |
| <i>Itga5</i>   | chrXII:7057481-7113347    | DTP 1                                              | Tooth plate shape                                                                     | Tooth development [74]                         |
| <i>Wnt5a</i>   | chrXII:8202228-8410911    | DTP 1, Flank skin, VTP 1 & 2, Mandible 1           | Tooth plate shape, dentary shape                                                      | Tooth development, facial development[44,45]   |
| <i>Tgfbr1b</i> | chrXXI:3449938-3520071    | VTP 1, DTP 2                                       | Tooth plate area, tooth plate shape                                                   | Tooth development [75]                         |
| <i>Sulfl</i>   | chrXXI:9696109-11646044   | DTP 1, VTP 1 & 2, Mandible 2, eyes                 | Tooth plate shape, jaw shape                                                          | Tooth development, skeletal development[76,77] |
| <i>Bmi1a</i>   | chrXXI:9696109-11646044   | VTP 1                                              | Tooth plate tooth number, tooth plate shape                                           | Tooth development [78]                         |
| <i>Mllt10</i>  | chrXXI:9696109-11646044   | DTP 1 & 2, VTP 1 & 2                               | Tooth plate shape, tooth plate tooth number                                           | Craniofacial development[79]                   |

625 <sup>1</sup>QTL data: Miller et al. [22], Cleves et al. [6], Erickson et al. [39]

626 **References**

- 627 1. Reid K, Bell MA, Veeramah KR. Threespine Stickleback: A Model System For  
628 Evolutionary Genomics. *Annual Review of Genomics and Human Genetics*. 2021;22: 357–  
629 383. doi:10.1146/annurev-genom-111720-081402
- 630 2. Bell M, Foster S. *The evolutionary biology of the threespine stickleback*. Oxford, UK:  
631 Oxford University Press; 1994.
- 632 3. Colosimo PF, Hosemann KE, Balabhadra S, Villarreal G, Dickson M, Grimwood J, et al.  
633 Widespread parallel evolution in sticklebacks by repeated fixation of Ectodysplasin alleles.  
634 *Science*. 2005;307: 1928–1933. doi:10.1126/science.1107239
- 635 4. Miller CT, Beleza S, Pollen AA, Schluter D, Kittles RA, Shriver MD, et al. cis-Regulatory  
636 Changes in Kit Ligand Expression and Parallel Evolution of Pigmentation in Sticklebacks  
637 and Humans. *Cell*. 2007;131: 1179–1189. doi:10.1016/j.cell.2007.10.055
- 638 5. Walker JA, Bell MA. Net evolutionary trajectories of body shape evolution within a  
639 microgeographic radiation of threespine sticklebacks (*Gasterosteus aculeatus*). *Journal of*  
640 *Zoology*. 2000;252: 293–302. doi:10.1111/j.1469-7998.2000.tb00624.x
- 641 6. Cleves PA, Ellis NA, Jimenez MT, Nunez SM, Schluter D, Kingsley DM, et al. Evolved  
642 tooth gain in sticklebacks is associated with a cis-regulatory allele of Bmp6. *Proceedings of*  
643 *the National Academy of Sciences*. 2014;111: 13912–13917. doi:10.1073/pnas.1407567111
- 644 7. O’Brown NM, Summers BR, Jones FC, Brady SD, Kingsley DM. A recurrent regulatory  
645 change underlying altered expression and Wnt response of the stickleback armor plates  
646 gene EDA. Krumlauf R, editor. *eLife*. 2015;4: e05290. doi:10.7554/eLife.05290
- 647 8. Jones FC, Grabherr MG, Chan YF, Russell P, Mauceli E, Johnson J, et al. The genomic  
648 basis of adaptive evolution in threespine sticklebacks. *Nature*. 2012;484: 55–61.  
649 doi:10.1038/nature10944
- 650 9. Roberts Kingman GA, Vyas DN, Jones FC, Brady SD, Chen HI, Reid K, et al. Predicting  
651 future from past: The genomic basis of recurrent and rapid stickleback evolution. *Science*  
652 *Advances*. 2021;7: eabg5285. doi:10.1126/sciadv.abg5285
- 653 10. Stern DL, Orgogozo V. Is genetic evolution predictable? *Science*. 2009;323: 746–751.  
654 doi:10.1126/science.1158997
- 655 11. Prud’homme B, Gompel N, Carroll SB. Emerging principles of regulatory evolution.  
656 *Proceedings of the National Academy of Sciences*. 2007;104: 8605–8612.  
657 doi:10.1073/pnas.0700488104
- 658 12. Signor SA, Nuzhdin SV. The evolution of gene expression in cis and trans. *Trends Genet*.  
659 2018;34: 532–544. doi:10.1016/j.tig.2018.03.007
- 660 13. Fraser HB. Gene expression drives local adaptation in humans. *Genome Res*. 2013;23:  
661 1089–1096. doi:10.1101/gr.152710.112

- 662 14. Chan YF, Marks ME, Jones FC, Villarreal G, Shapiro MD, Brady SD, et al. Adaptive  
663 evolution of pelvic reduction in sticklebacks by recurrent deletion of a Pitx1 enhancer.  
664 Science. 2010;327: 302–305. doi:10.1126/science.1182213
- 665 15. Stepaniak MD, Square TA, Miller CT. Evolved Bmp6 enhancer alleles drive spatial shifts  
666 in gene expression during tooth development in sticklebacks. Genetics. 2021;219: iyab151.  
667 doi:10.1093/genetics/iyab151
- 668 16. Roberts Kingman GA, Lee D, Jones FC, Desmet D, Bell MA, Kingsley DM. Longer or  
669 shorter spines: Reciprocal trait evolution in stickleback via triallelic regulatory changes in  
670 Stanniocalcin2a. Proceedings of the National Academy of Sciences. 2021;118:  
671 e2100694118. doi:10.1073/pnas.2100694118
- 672 17. Howes TR, Summers BR, Kingsley DM. Dorsal spine evolution in threespine sticklebacks  
673 via a splicing change in MSX2A. BMC Biology. 2017;15: 115. doi:10.1186/s12915-017-  
674 0456-5
- 675 18. Verta J-P, Jones FC. Predominance of cis-regulatory changes in parallel expression  
676 divergence of sticklebacks. de Meaux J, Tautz D, editors. eLife. 2019;8: e43785.  
677 doi:10.7554/eLife.43785
- 678 19. Hart JC, Ellis NA, Eisen MB, Miller CT. Convergent evolution of gene expression in two  
679 high-toothed stickleback populations. PLOS Genetics. 2018;14: e1007443.  
680 doi:10.1371/journal.pgen.1007443
- 681 20. Cowles CR, Hirschhorn JN, Altshuler D, Lander ES. Detection of regulatory variation in  
682 mouse genes. Nat Genet. 2002;32: 432–437. doi:10.1038/ng992
- 683 21. Wittkopp PJ, Haerum BK, Clark AG. Evolutionary changes in cis and trans gene regulation.  
684 Nature. 2004;430: 85–88. doi:10.1038/nature02698
- 685 22. Miller CT, Glazer AM, Summers BR, Blackman BK, Norman AR, Shapiro MD, et al.  
686 Modular Skeletal Evolution in Sticklebacks Is Controlled by Additive and Clustered  
687 Quantitative Trait Loci. Genetics. 2014;197: 405–420. doi:10.1534/genetics.114.162420
- 688 23. Pirinen M, Lappalainen T, Zaitlen NA, GTEx Consortium, Dermitzakis ET, Donnelly P, et  
689 al. Assessing allele-specific expression across multiple tissues from RNA-seq read data.  
690 Bioinformatics. 2015;31: 2497–2504. doi:10.1093/bioinformatics/btv074
- 691 24. Choi CS, Savage DB, Kulkarni A, Yu XX, Liu Z-X, Morino K, et al. Suppression of  
692 Diacylglycerol Acyltransferase-2 (DGAT2), but Not DGAT1, with Antisense  
693 Oligonucleotides Reverses Diet-induced Hepatic Steatosis and Insulin Resistance\*. Journal  
694 of Biological Chemistry. 2007;282: 22678–22688. doi:10.1074/jbc.M704213200
- 695 25. O'Hare EA, Yang R, Yerges-Armstrong L, Sreenivasan U, McFarland R, Leitch CC, et al.  
696 TM6SF2 rs58542926 impacts lipid processing in liver and small intestine. Hepatology.  
697 2017;65: 1526–1542. doi:10.1002/hep.29021

- 698 26. Lavin PA, McPhail JD. Adaptive Divergence of Trophic Phenotype among Freshwater  
699 Populations of the Threespine Stickleback (*Gasterosteus aculeatus*). *Can J Fish Aquat Sci.*  
700 1986;43: 2455–2463. doi:10.1139/f86-305
- 701 27. Ellis NA, Glazer AM, Donde NN, Cleves PA, Agoglia RM, Miller CT. Distinct  
702 developmental genetic mechanisms underlie convergently evolved tooth gain in  
703 sticklebacks. *Development.* 2015;142: 2442–2451. doi:10.1242/dev.124248
- 704 28. Stock DW. Zebrafish dentition in comparative context. *Journal of Experimental Zoology*  
705 *Part B: Molecular and Developmental Evolution.* 2007;308B: 523–549.  
706 doi:10.1002/jez.b.21187
- 707 29. Fraser GJ, Hulsey CD, Bloomquist RF, Uyesugi K, Manley NR, Strelman JT. An ancient  
708 gene network is co-opted for teeth on old and new jaws. *PLoS Biol.* 2009;7: e31.  
709 doi:10.1371/journal.pbio.1000031
- 710 30. Bullard JH, Mostovoy Y, Dudoit S, Brem RB. Polygenic and directional regulatory  
711 evolution across pathways in *Saccharomyces*. *Proc Natl Acad Sci U S A.* 2010;107: 5058–  
712 5063. doi:10.1073/pnas.0912959107
- 713 31. Fraser HB, Babak T, Tsang J, Zhou Y, Zhang B, Mehrabian M, et al. Systematic Detection  
714 of Polygenic cis-Regulatory Evolution. *PLOS Genetics.* 2011;7: e1002023.  
715 doi:10.1371/journal.pgen.1002023
- 716 32. Orr HA. Testing natural selection vs. genetic drift in phenotypic evolution using  
717 quantitative trait locus data. *Genetics.* 1998;149: 2099–2104.
- 718 33. Liu F, Chu EY, Watt B, Zhang Y, Gallant NM, Andl T, et al. Wnt/ $\beta$ -catenin signaling  
719 directs multiple stages of tooth morphogenesis. *Developmental Biology.* 2008;313: 210–  
720 224. doi:10.1016/j.ydbio.2007.10.016
- 721 34. Square TA, Sundaram S, Mackey EJ, Miller CT. Distinct tooth regeneration systems deploy  
722 a conserved battery of genes. *EvoDevo.* 2021;12: 4. doi:10.1186/s13227-021-00172-3
- 723 35. Kraus P, Lufkin T. Dlx homeobox gene control of mammalian limb and craniofacial  
724 development. *Am J Med Genet A.* 2006;140: 1366–1374. doi:10.1002/ajmg.a.31252
- 725 36. Pang L, Zhang Z, Shen Y, Cheng Z, Gao X, Zhang B, et al. Mutant *dlx3b* disturbs normal  
726 tooth mineralization and bone formation in zebrafish. *PeerJ.* 2020;8: e8515.  
727 doi:10.7717/peerj.8515
- 728 37. Jeong J, Li X, McEvelly RJ, Rosenfeld MG, Lufkin T, Rubenstein JLR. Dlx genes pattern  
729 mammalian jaw primordium by regulating both lower jaw-specific and upper jaw-specific  
730 genetic programs. *Development.* 2008;135: 2905–2916. doi:10.1242/dev.019778
- 731 38. Erickson PA, Baek J, Hart JC, Cleves PA, Miller CT. Genetic Dissection of a Supergene  
732 Implicates *Tfap2a* in Craniofacial Evolution of Threespine Sticklebacks. *Genetics.*  
733 2018;209: 591–605. doi:10.1534/genetics.118.300760



- 734 39. Erickson PA, Glazer AM, Killingbeck EE, Agoglia RM, Baek J, Carsanaro SM, et al.  
735 Partially repeatable genetic basis of benthic adaptation in threespine sticklebacks.  
736 *Evolution*. 2016;70: 887–902. doi:10.1111/evo.12897
- 737 40. Hu CK, York RA, Metz HC, Bedford NL, Fraser HB, Hoekstra HE. cis-Regulatory changes  
738 in locomotor genes are associated with the evolution of burrowing behavior. *Cell Rep*.  
739 2022;38: 110360. doi:10.1016/j.celrep.2022.110360
- 740 41. Indjeian VB, Kingman GA, Jones FC, Guenther CA, Grimwood J, Schmutz J, et al.  
741 Evolving New Skeletal Traits by cis-Regulatory Changes in Bone Morphogenetic Proteins.  
742 *Cell*. 2016;164: 45–56. doi:10.1016/j.cell.2015.12.007
- 743 42. Johnston J, Ramos-Valdes Y, Stanton L-A, Ladhani S, Beier F, Dimattia GE. Human  
744 stanniocalcin-1 or -2 expressed in mice reduces bone size and severely inhibits cranial  
745 intramembranous bone growth. *Transgenic Res*. 2010;19: 1017–1039. doi:10.1007/s11248-  
746 010-9376-7
- 747 43. Gagliardi AD, Kuo EYW, Raulic S, Wagner GF, DiMattia GE. Human stanniocalcin-2  
748 exhibits potent growth-suppressive properties in transgenic mice independently of growth  
749 hormone and IGFs. *Am J Physiol Endocrinol Metab*. 2005;288: E92-105.  
750 doi:10.1152/ajpendo.00268.2004
- 751 44. Lin M, Li L, Liu C, Liu H, He F, Yan F, et al. Wnt5a regulates growth, patterning, and  
752 odontoblast differentiation of developing mouse tooth. *Dev Dyn*. 2011;240: 432–440.  
753 doi:10.1002/dvdy.22550
- 754 45. Hosseini-Farahabadi S, Gignac SJ, Danescu A, Fu K, Richman JM. Abnormal WNT5A  
755 Signaling Causes Mandibular Hypoplasia in Robinow Syndrome. *J Dent Res*. 2017;96:  
756 1265–1272. doi:10.1177/0022034517716916
- 757 46. Yamaguchi TP, Bradley A, McMahon AP, Jones S. A Wnt5a pathway underlies outgrowth  
758 of multiple structures in the vertebrate embryo. *Development*. 1999;126: 1211–1223.  
759 doi:10.1242/dev.126.6.1211
- 760 47. Li H, Handsaker B, Wysoker A, Fennell T, Ruan J, Homer N, et al. The Sequence  
761 Alignment/Map format and SAMtools. *Bioinformatics*. 2009;25: 2078–2079.  
762 doi:10.1093/bioinformatics/btp352
- 763 48. Bolger AM, Lohse M, Usadel B. Trimmomatic: a flexible trimmer for Illumina sequence  
764 data. *Bioinformatics*. 2014;30: 2114–2120. doi:10.1093/bioinformatics/btu170
- 765 49. Peichel CL, Sullivan ST, Liachko I, White MA. Improvement of the Threespine  
766 Stickleback Genome Using a Hi-C-Based Proximity-Guided Assembly. *Journal of*  
767 *Heredity*. 2017;108: 693–700. doi:10.1093/jhered/esx058
- 768 50. Dobin A, Davis CA, Schlesinger F, Drenkow J, Zaleski C, Jha S, et al. STAR: ultrafast  
769 universal RNA-seq aligner. *Bioinformatics*. 2013;29: 15–21.  
770 doi:10.1093/bioinformatics/bts635

- 771 51. Langmead B, Salzberg SL. Fast gapped-read alignment with Bowtie 2. *Nat Methods*.  
772 2012;9: 357–359. doi:10.1038/nmeth.1923
- 773 52. McKenna A, Hanna M, Banks E, Sivachenko A, Cibulskis K, Kernytzky A, et al. The  
774 Genome Analysis Toolkit: A MapReduce framework for analyzing next-generation DNA  
775 sequencing data. *Genome Res*. 2010;20: 1297–1303. doi:10.1101/gr.107524.110
- 776 53. van de Geijn B, McVicker G, Gilad Y, Pritchard JK. WASP: allele-specific software for  
777 robust molecular quantitative trait locus discovery. *Nat Methods*. 2015;12: 1061–1063.  
778 doi:10.1038/nmeth.3582
- 779 54. Anders S, Pyl PT, Huber W. HTSeq--a Python framework to work with high-throughput  
780 sequencing data. *Bioinformatics*. 2015;31: 166–169. doi:10.1093/bioinformatics/btu638
- 781 55. Love MI, Huber W, Anders S. Moderated estimation of fold change and dispersion for  
782 RNA-seq data with DESeq2. *Genome Biology*. 2014;15: 550. doi:10.1186/s13059-014-  
783 0550-8
- 784 56. Skelly DA, Johansson M, Madeoy J, Wakefield J, Akey JM. A powerful and flexible  
785 statistical framework for testing hypotheses of allele-specific gene expression from RNA-  
786 seq data. *Genome Res*. 2011;21: 1728–1737. doi:10.1101/gr.119784.110
- 787 57. Bradford YM, Van Slyke CE, Ruzicka L, Singer A, Eagle A, Fashena D, et al. Zebrafish  
788 information network, the knowledgebase for *Danio rerio* research. *Genetics*. 2022;220:  
789 iyac016. doi:10.1093/genetics/iyac016
- 790 58. Artieri CG, Naor A, Turgeman-Grott I, Zhou Y, York R, Gophna U, et al. Cis-regulatory  
791 evolution in prokaryotes revealed by interspecific archaeal hybrids. *Sci Rep*. 2017;7: 3986.  
792 doi:10.1038/s41598-017-04278-4
- 793 59. Quinlan AR, Hall IM. BEDTools: a flexible suite of utilities for comparing genomic  
794 features. *Bioinformatics*. 2010;26: 841–842. doi:10.1093/bioinformatics/btq033
- 795 60. Blake JA, Baldarelli R, Kadin JA, Richardson JE, Smith CL, Bult CJ, et al. Mouse Genome  
796 Database (MGD): Knowledgebase for mouse–human comparative biology. *Nucleic Acids*  
797 *Research*. 2021;49: D981–D987. doi:10.1093/nar/gkaa1083
- 798 61. Peichel CL, Marques DA. The genetic and molecular architecture of phenotypic diversity in  
799 sticklebacks. *Philosophical Transactions of the Royal Society B: Biological Sciences*.  
800 2017;372: 20150486. doi:10.1098/rstb.2015.0486
- 801 62. Bello IO, Soini Y, Slootweg PJ, Salo T. Claudins 1, 4, 5, 7 and occludin in ameloblastomas  
802 and developing human teeth. *J Oral Pathol Med*. 2007;36: 48–54. doi:10.1111/j.1600-  
803 0714.2006.00497.x
- 804 63. Aizawa C, Saito K, Ohshima H. Regulation of IGF-I by IGFBP3 and IGFBP5 during  
805 odontoblast differentiation in mice. *J Oral Biosci*. 2019;61: 157–162.  
806 doi:10.1016/j.job.2019.07.001

- 807 64. Mukherjee A, Rotwein P. Insulin-like growth factor-binding protein-5 inhibits osteoblast  
808 differentiation and skeletal growth by blocking insulin-like growth factor actions. *Mol*  
809 *Endocrinol.* 2008;22: 1238–1250. doi:10.1210/me.2008-0001
- 810 65. Xavier GM, Sharpe PT, Cobourne MT. Scube1 is expressed during facial development in  
811 the mouse. *Journal of Experimental Zoology Part B: Molecular and Developmental*  
812 *Evolution.* 2009;312B: 518–524. doi:10.1002/jez.b.21260
- 813 66. Abdullah A, Herdenberg C, Hedman H. Netrin-1 functions as a suppressor of bone  
814 morphogenetic protein (BMP) signaling. *Sci Rep.* 2021;11: 8585. doi:10.1038/s41598-021-  
815 87949-7
- 816 67. Li Q-M, Li J-L, Feng Z-H, Lin H-C, Xu Q. Effect of histone demethylase KDM5A on the  
817 odontogenic differentiation of human dental pulp cells. *Bioengineered.* 2020;11: 449–462.  
818 doi:10.1080/21655979.2020.1743536
- 819 68. Xu J, Yu B, Hong C, Wang C-Y. KDM6B epigenetically regulates odontogenic  
820 differentiation of dental mesenchymal stem cells. *Int J Oral Sci.* 2013;5: 200–205.  
821 doi:10.1038/ijos.2013.77
- 822 69. Zhang F, Xu L, Xu L, Xu Q, Li D, Yang Y, et al. JMJD3 promotes chondrocyte  
823 proliferation and hypertrophy during endochondral bone formation in mice. *J Mol Cell*  
824 *Biol.* 2015;7: 23–34. doi:10.1093/jmcb/mjv003
- 825 70. Romanos GE, Asnani KP, Hingorani D, Deshmukh VL. PERIOSTIN: Role in Formation  
826 and Maintenance of Dental Tissues. *Journal of Cellular Physiology.* 2014;229: 1–5.  
827 doi:10.1002/jcp.24407
- 828 71. Nunia K, Urs AB, Kumar P. Interplay Between MMP-9 and TIMP-2 Regulates  
829 Ameloblastoma Behavior and Tooth Morphogenesis. *Appl Immunohistochem Mol*  
830 *Morphol.* 2016;24: 364–372. doi:10.1097/PAI.0000000000000196
- 831 72. Vu TH, Shipley JM, Bergers G, Berger JE, Helms JA, Hanahan D, et al. MMP-9/Gelatinase  
832 B Is a Key Regulator of Growth Plate Angiogenesis and Apoptosis of Hypertrophic  
833 Chondrocytes. *Cell.* 1998;93: 411–422. doi:10.1016/S0092-8674(00)81169-1
- 834 73. Ni Q, Chen S. Assessing the Effect of Matrix Metalloproteinase-9 on the Growth of Mice  
835 Teeth by NMR. *J Biol Pharm Chem Res.* 2014;1: 192–204.
- 836 74. Wang H, Ning T, Song C, Luo X, Xu S, Zhang X, et al. Priming integrin  $\alpha 5$  promotes  
837 human dental pulp stem cells odontogenic differentiation due to extracellular matrix  
838 deposition and amplified extracellular matrix-receptor activity. *J Cell Physiol.* 2019;234:  
839 12897–12909. doi:10.1002/jcp.27954
- 840 75. Niwa T, Yamakoshi Y, Yamazaki H, Karakida T, Chiba R, Hu JC-C, et al. The dynamics of  
841 TGF- $\beta$  in dental pulp, odontoblasts and dentin. *Sci Rep.* 2018;8: 4450. doi:10.1038/s41598-  
842 018-22823-7

- 843 76. Hayano S, Kurosaka H, Yanagita T, Kalus I, Milz F, Ishihara Y, et al. Roles of Heparan  
844 Sulfate Sulfation in Dentinogenesis. *J Biol Chem.* 2012;287: 12217–12229.  
845 doi:10.1074/jbc.M111.332924
- 846 77. Ratzka A, Kalus I, Moser M, Dierks T, Mundlos S, Vortkamp A. Redundant function of the  
847 heparan sulfate 6-O-endosulfatases Sulf1 and Sulf2 during skeletal development.  
848 *Developmental Dynamics.* 2008;237: 339–353. doi:10.1002/dvdy.21423
- 849 78. Yin Y, Zhou N, Zhang H, Dai X, Lv X, Chen N, et al. Bmi1 regulate tooth and mandible  
850 development by inhibiting p16 signal pathway. *J Cell Mol Med.* 2021;25: 4195–4203.  
851 doi:10.1111/jcmm.16468
- 852 79. Ogoh H, Yamagata K, Nakao T, Sandell LL, Yamamoto A, Yamashita A, et al. Mllt10  
853 knockout mouse model reveals critical role of Afl0-dependent H3K79 methylation in  
854 midfacial development. *Sci Rep.* 2017;7: 11922. doi:10.1038/s41598-017-11745-5
- 855
